# Supplementary material
Source: PubMed Central journal article supplement (PMC3491708)

Image 1

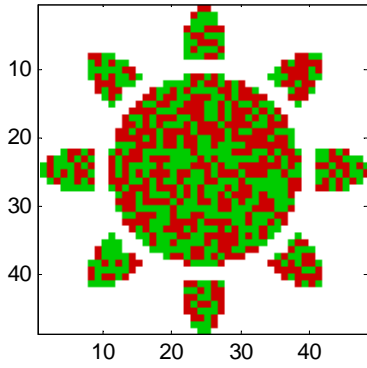

Image 2

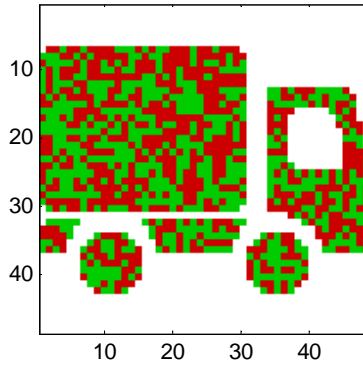

Image 3

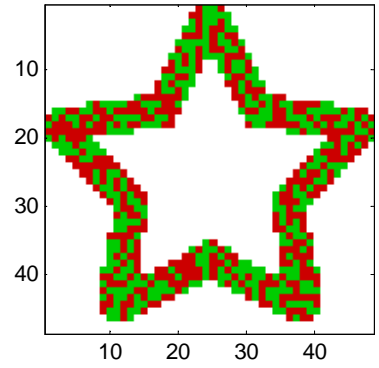

Image 4

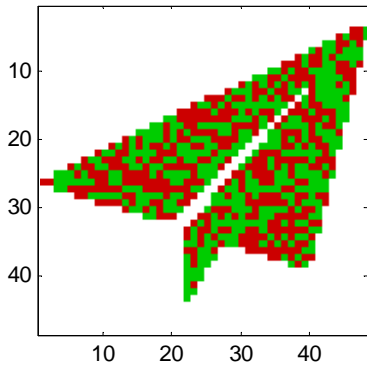

Image 5

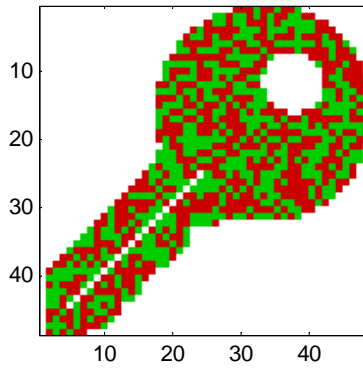

Image 6

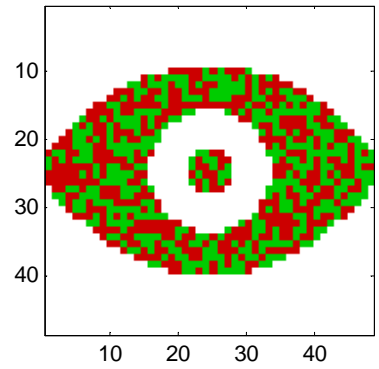

Image 7

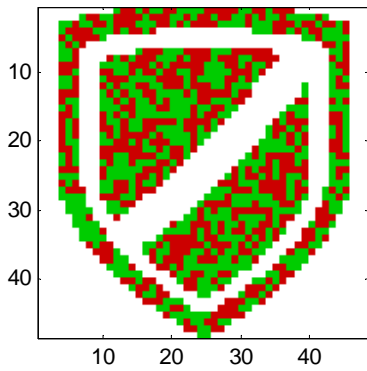

Image 8

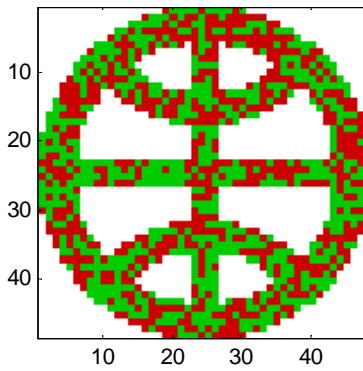

Image 9

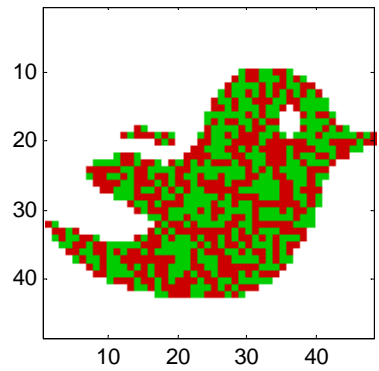

Image 11

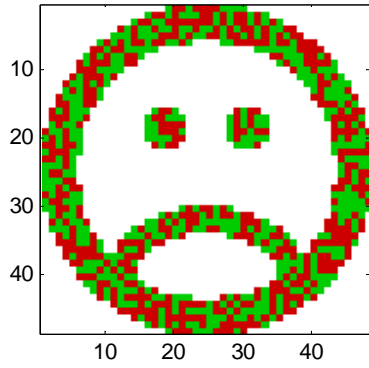

Image 12

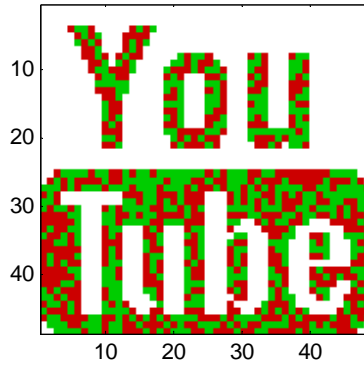

Image 13

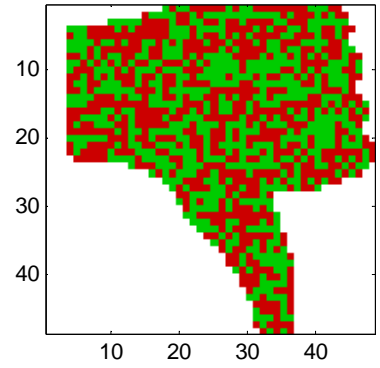

Image 14

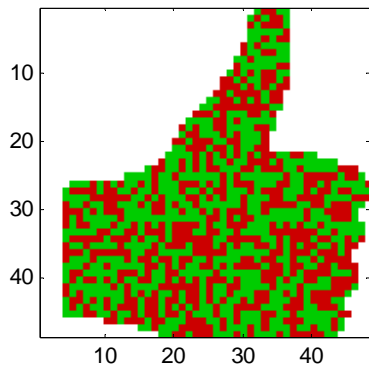

Image 15

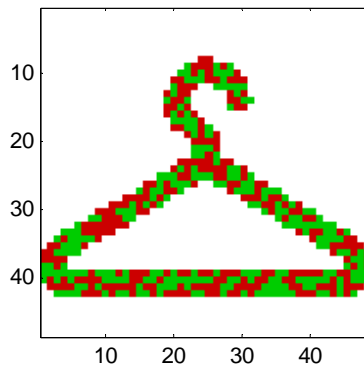

Image 16

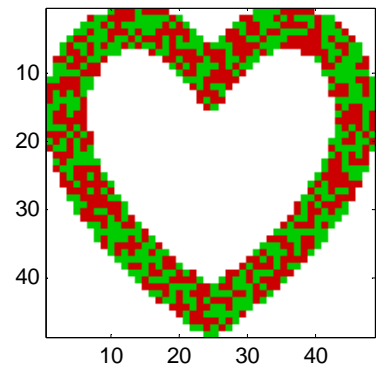

Image 17

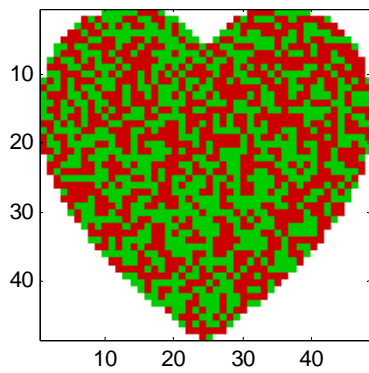

Image 18

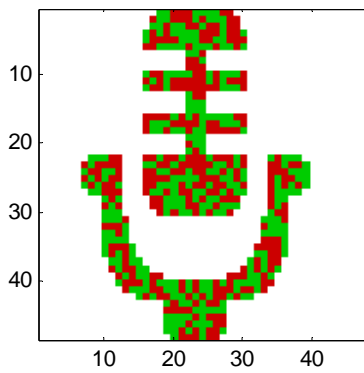

Image 19

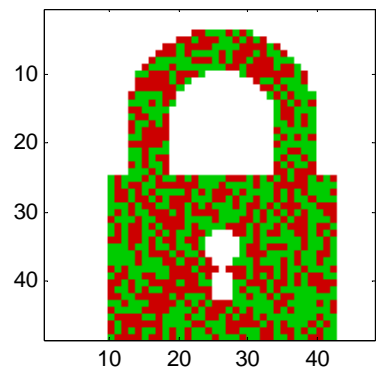

Image 21

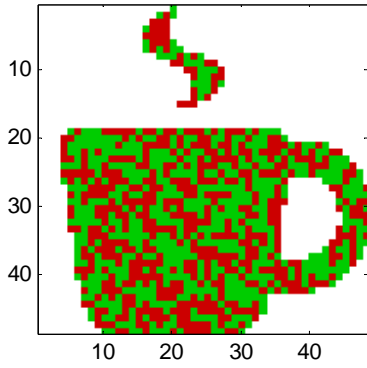

Image 22

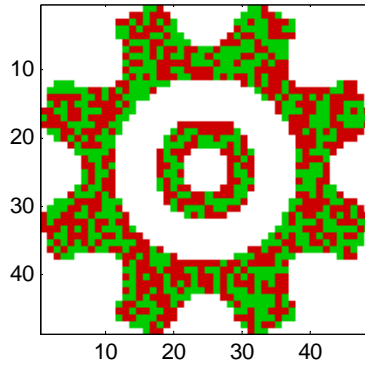

Image 23

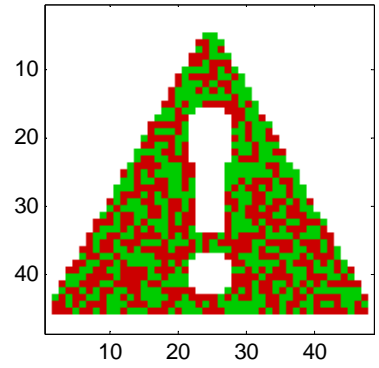

Image 24

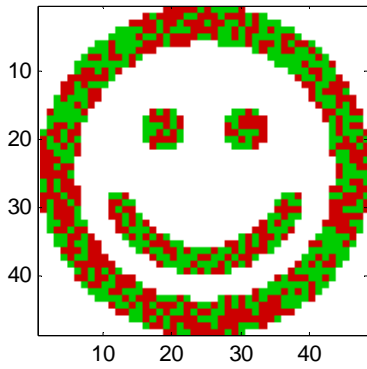

Image 25

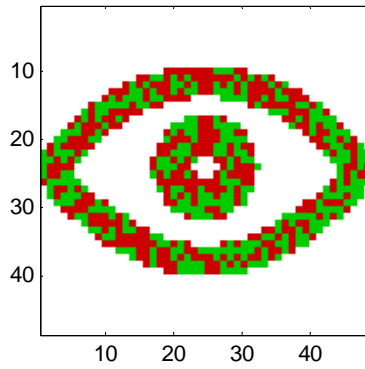

Image 26

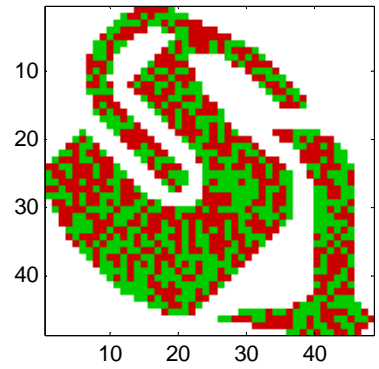

Image 27

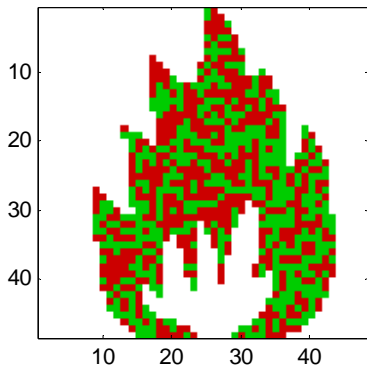

Image 28

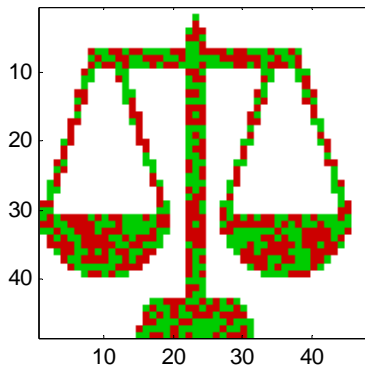

Image 29

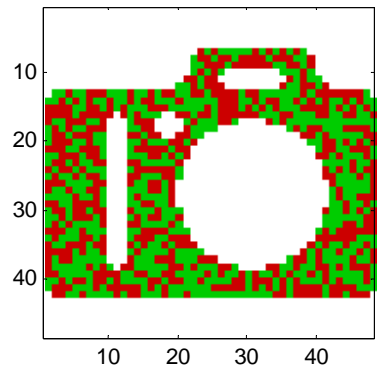

Image 31

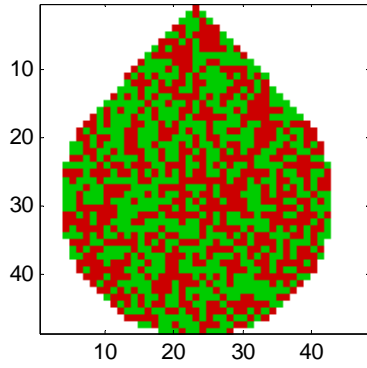

Image 32

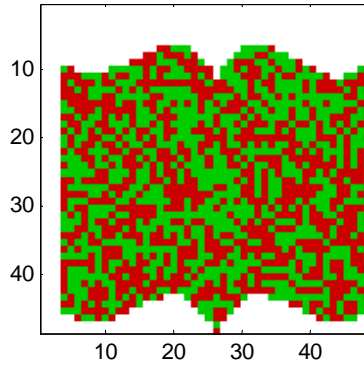

Image 33

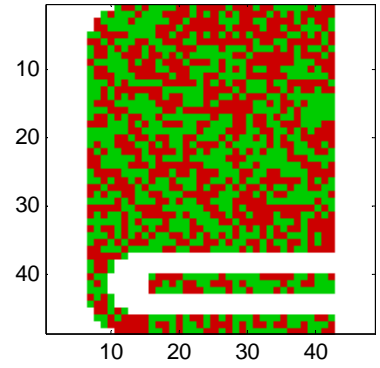

Image 34

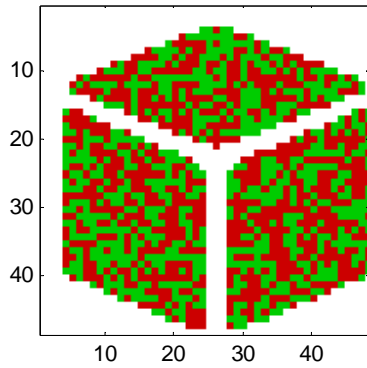

Image 35

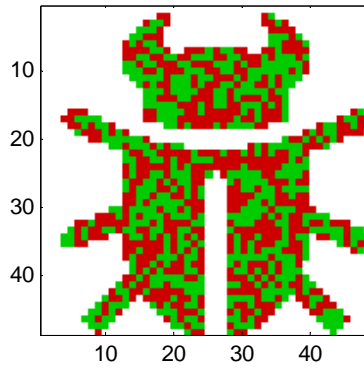

Image 36

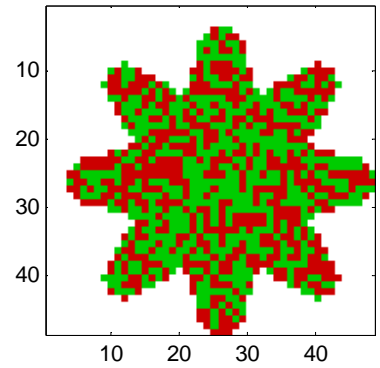

Image 37

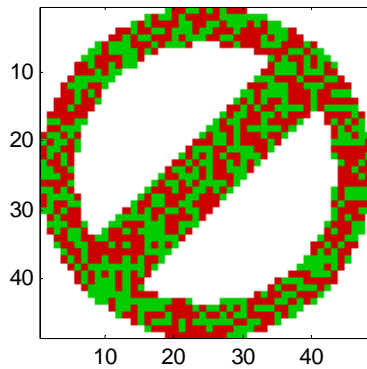

Image 38

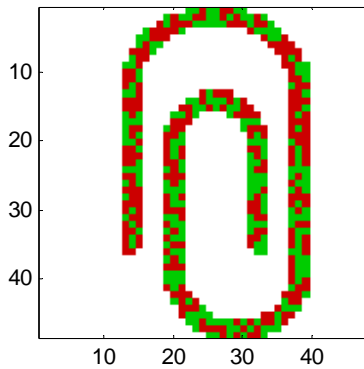

Image 39

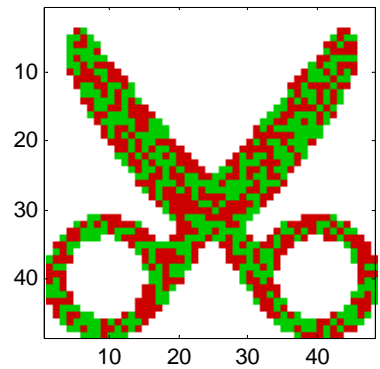

Image 41

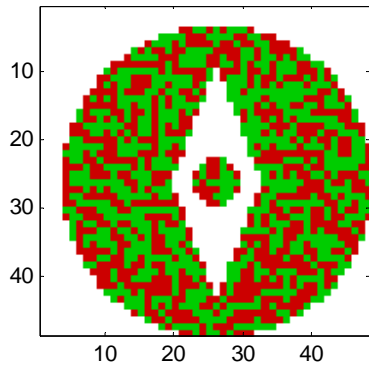

Image 42

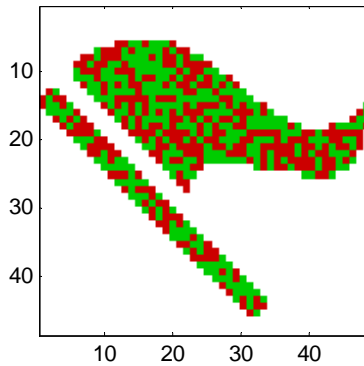

Image 43

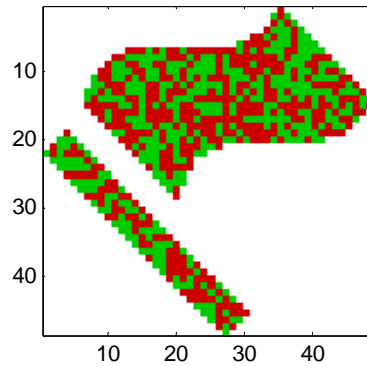

Image 44

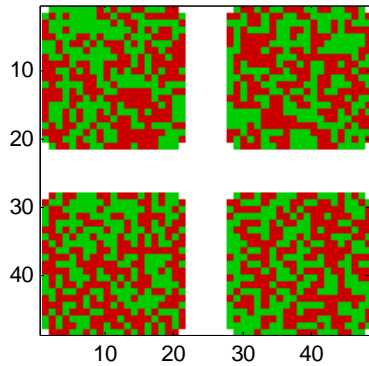

Image 45

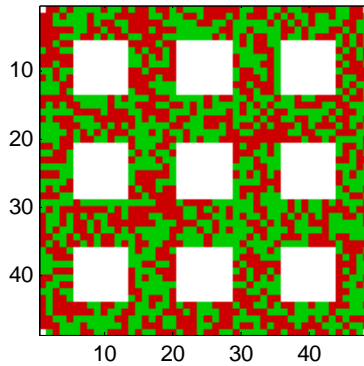

Image 46

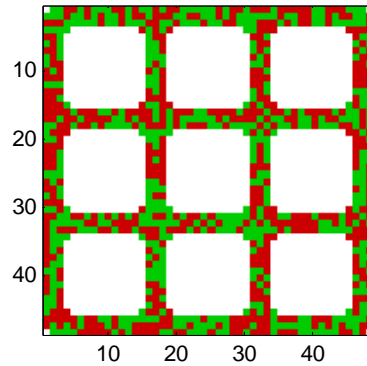

Image 47

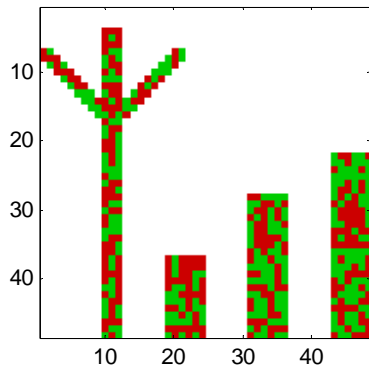

Image 48

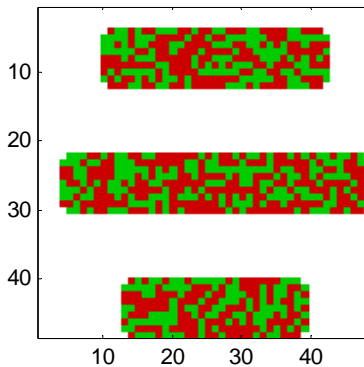

Image 49

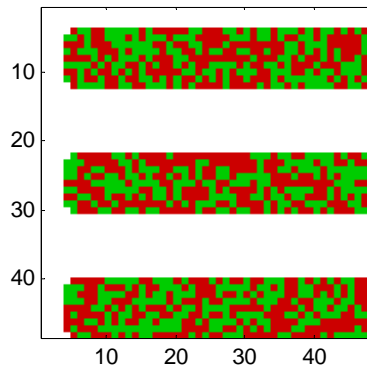

Image 51

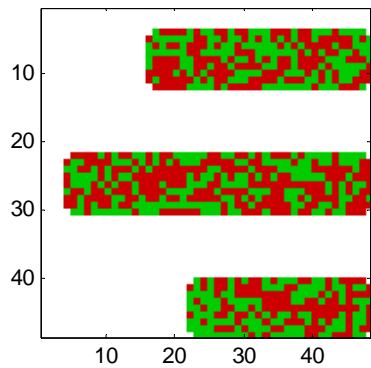

Image 52

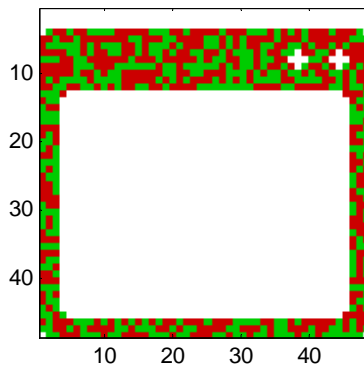

Image 53

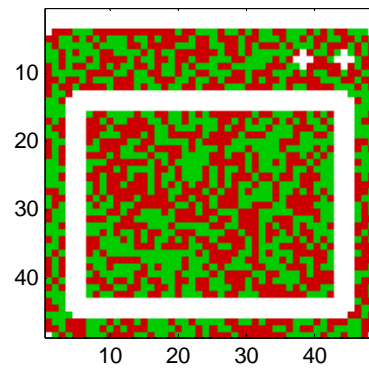

Image 54

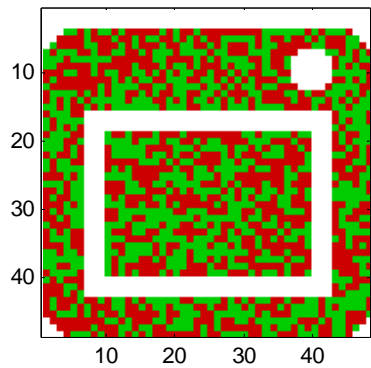

Image 55

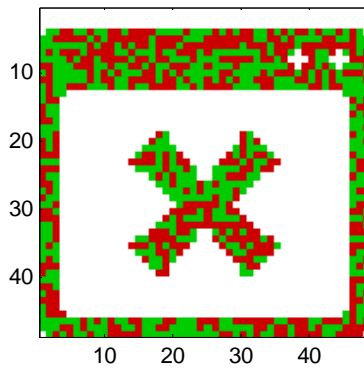

Image 56

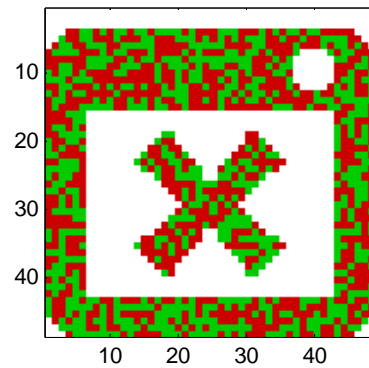

Image 57

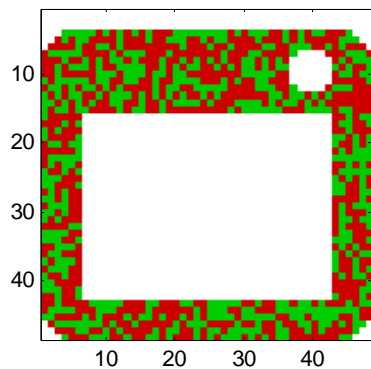

Image 58

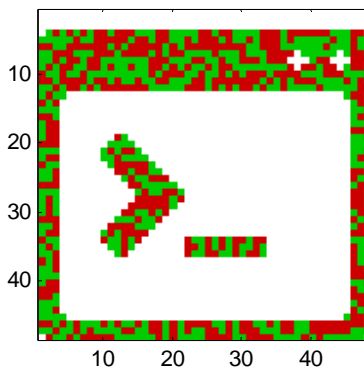

Image 59

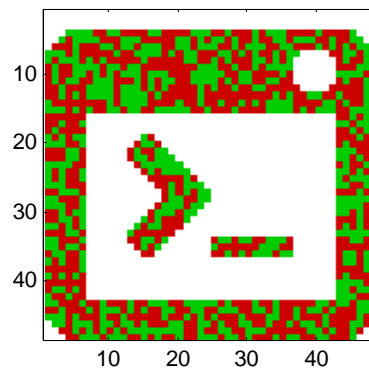

Image 61

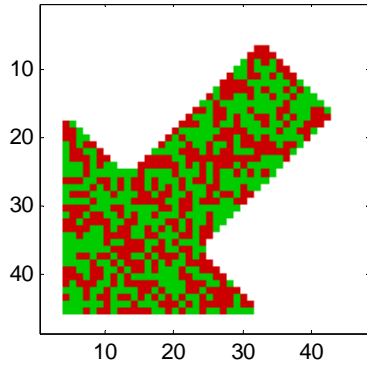

Image 62

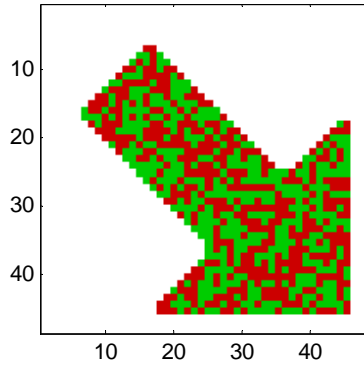

Image 63

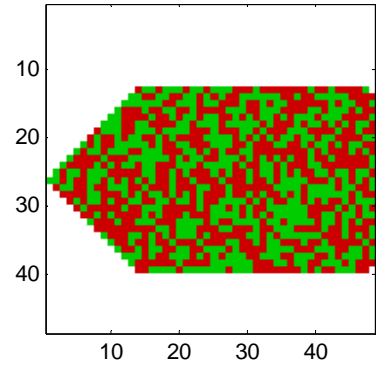

Image 64

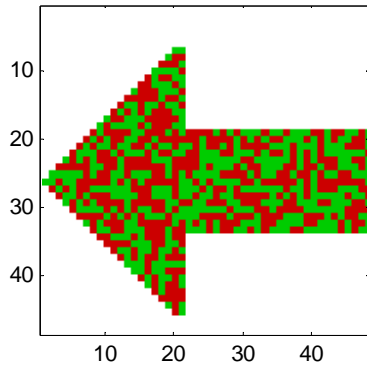

Image 65

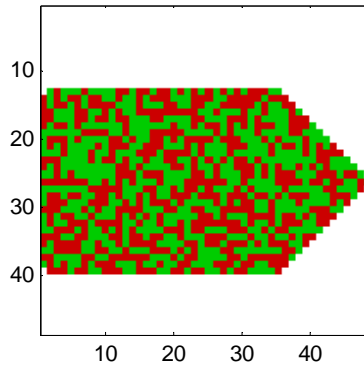

Image 66

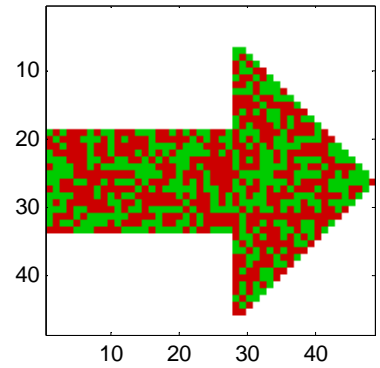

Image 67

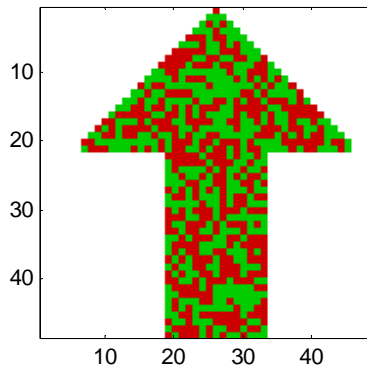

Image 68

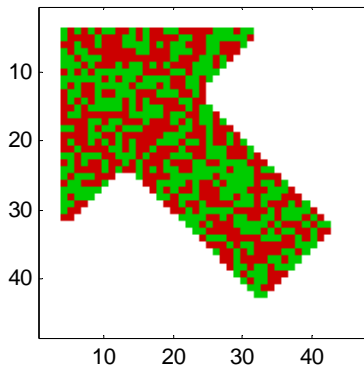

Image 69

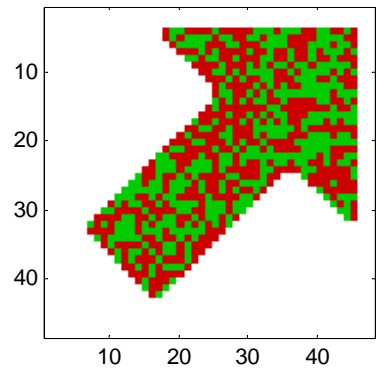

Image 71

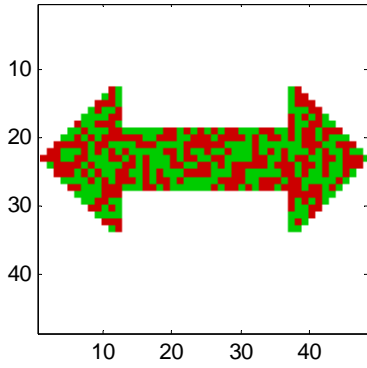

Image 72

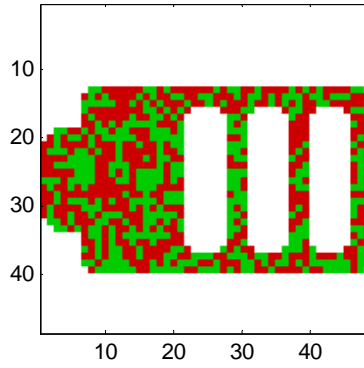

Image 73

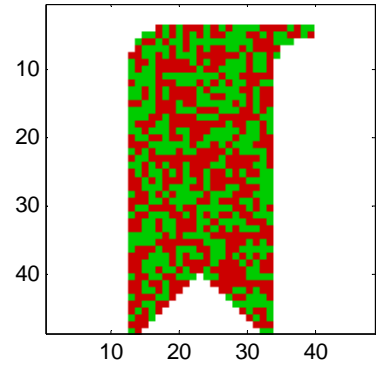

Image 74

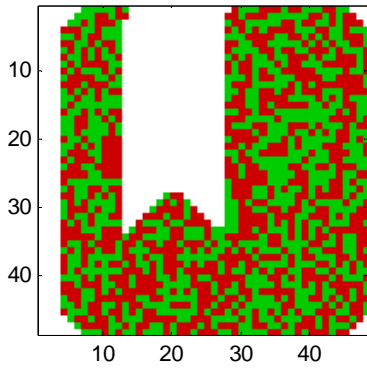

Image 75

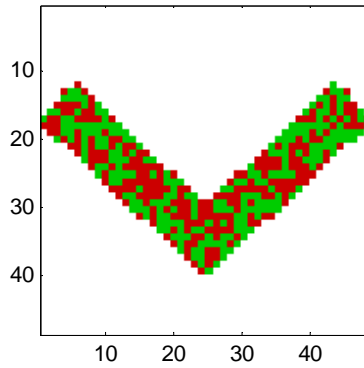

Image 76

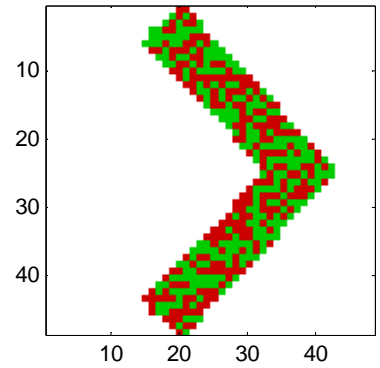

Image 77

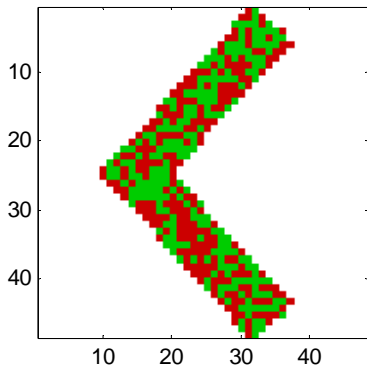

Image 78

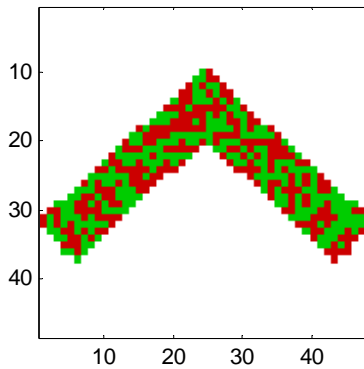

Image 79

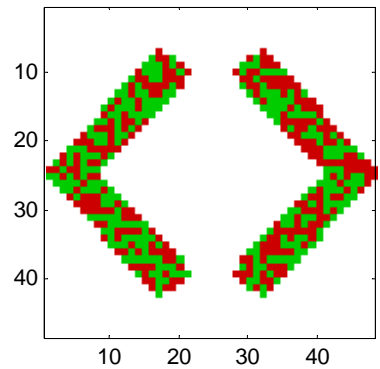



Image 81

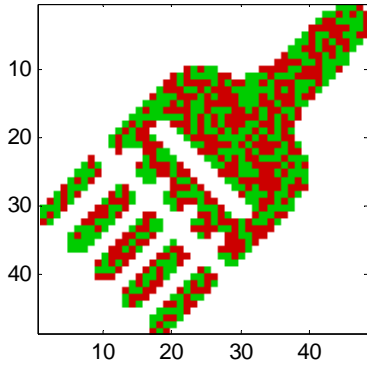

Image 82

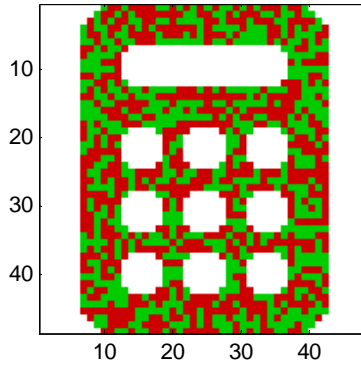

Image 83

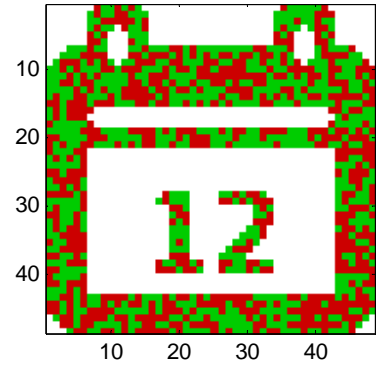

Image 84

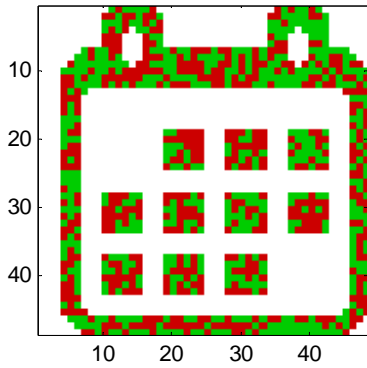

Image 85

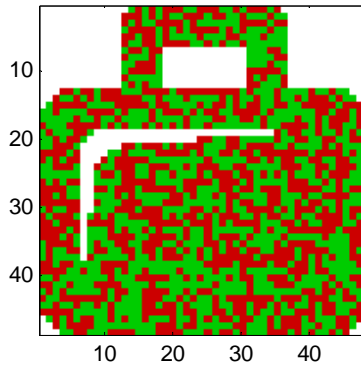

Image 86

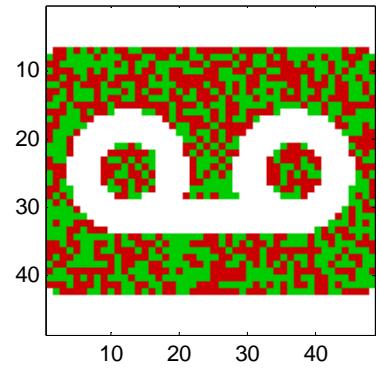

Image 87

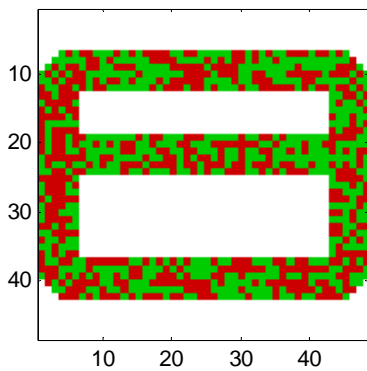

Image 88

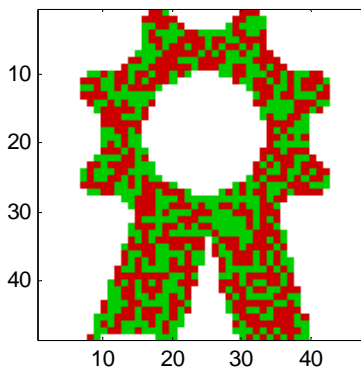

Image 89

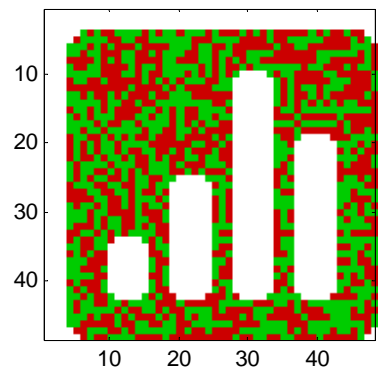



Image 91

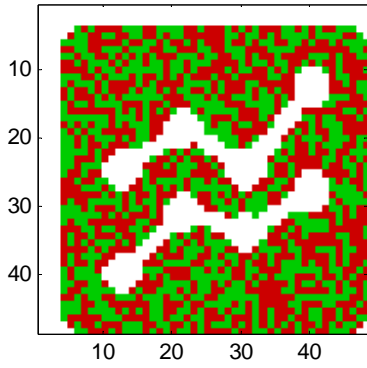

Image 92

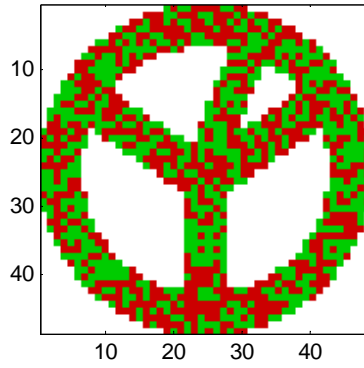

Image 93

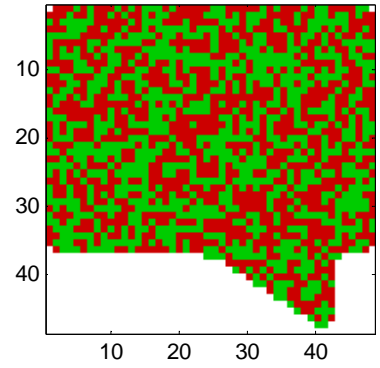

Image 94

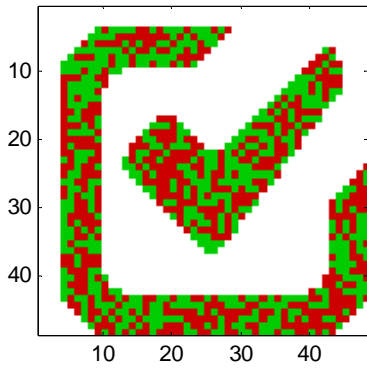

Image 95

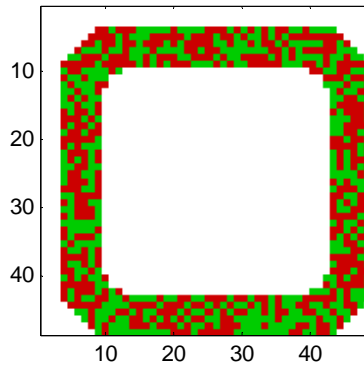

Image 96

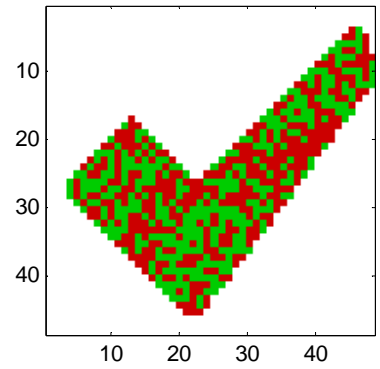

Image 97

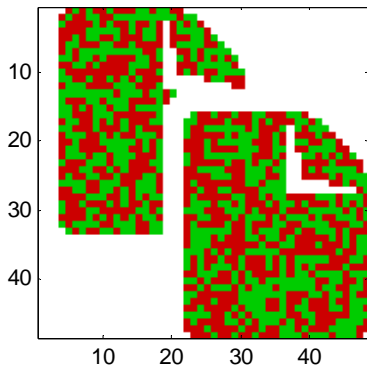

Image 98

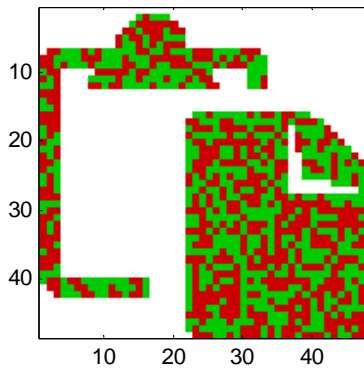

Image 99

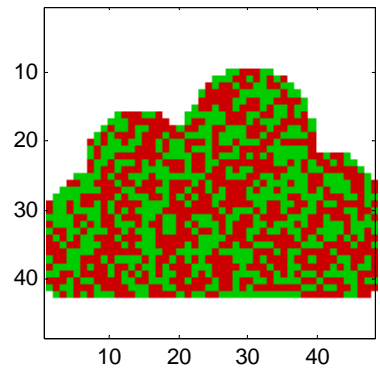

Supplement: mmc1.pdf [file mmc1.pdf]
