# Supplementary material
Source: PubMed Central journal article supplement (PMC3491708)
Supplement: mmc2.pdf [file mmc2.pdf]

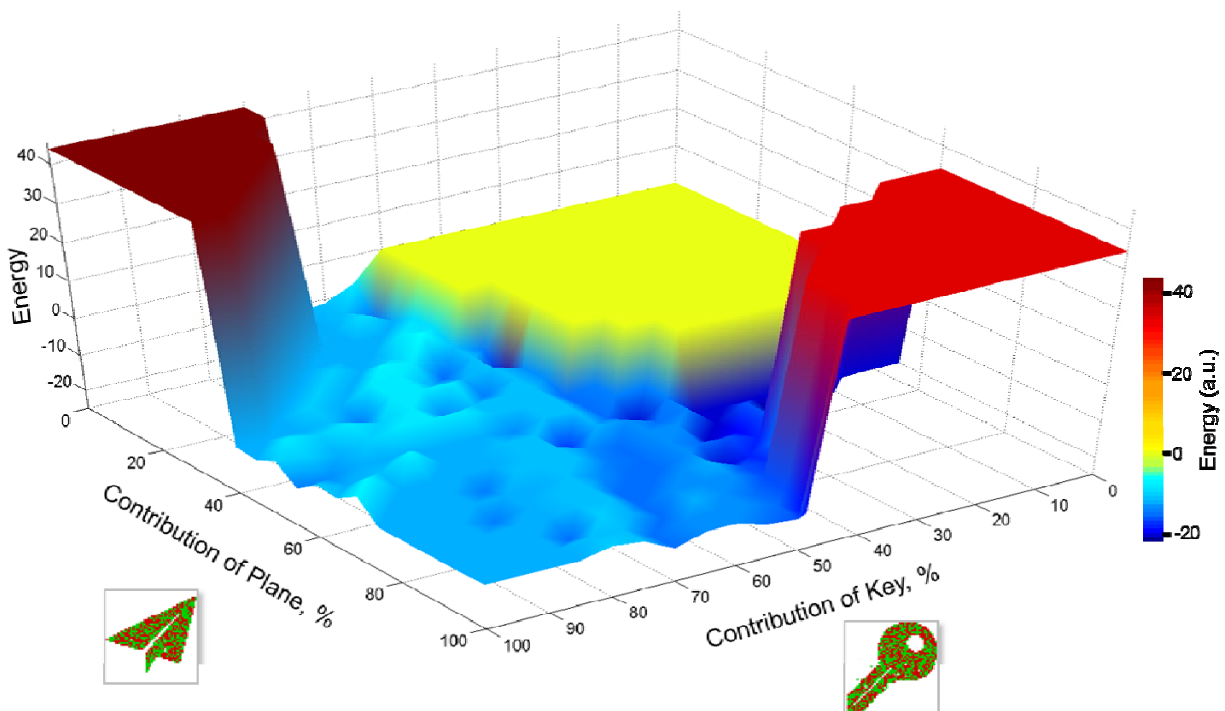

**Supplementary Figure 1.** Energy landscape of hybrids resulting from fusion of Plane and Key. This is a 3D representation of Figure 3C. The energy is given by the Lyapunov function defined in equation (3).

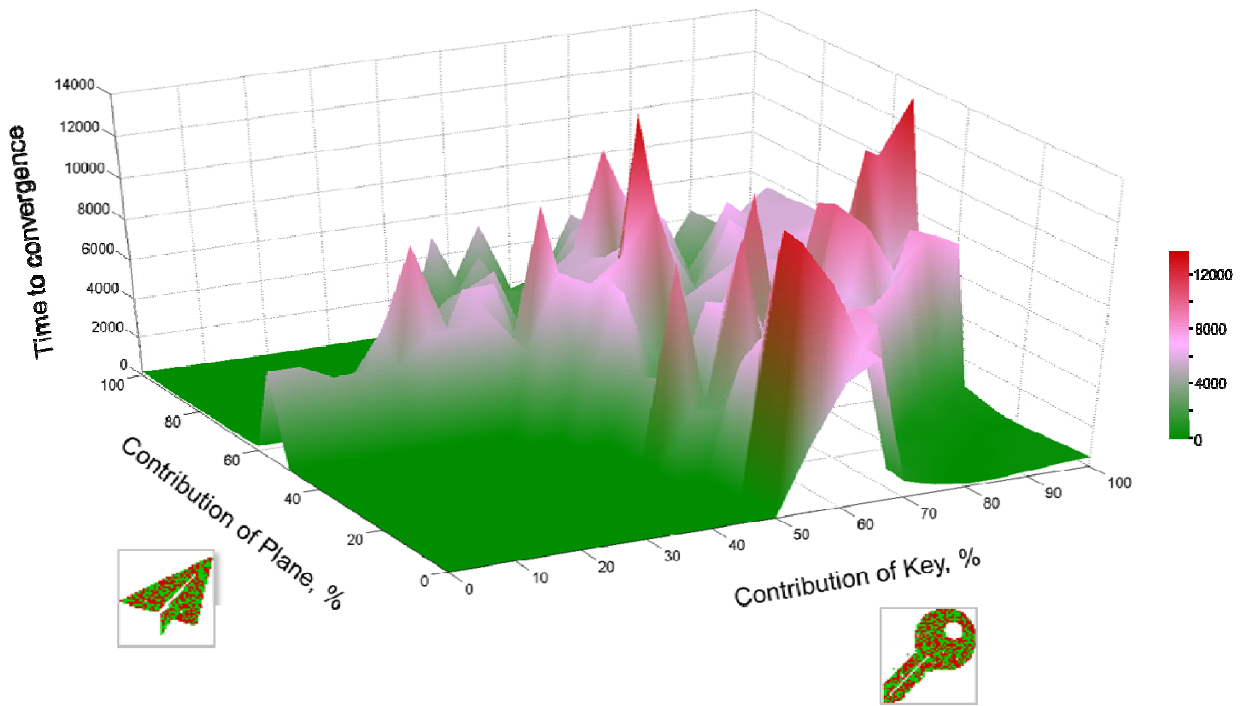

**Supplementary Figure 2.** Time to convergence for hybrids resulting from fusion of Plane and Key. This is a 3D representation of Figure 3D. Time to convergence is defined in the last paragraph of Supplementary Methods.
